# Supplementary material for: Investigation of the October effect in VLF signals
Source: Copernicus journal article supplement (doi:10.5194/angeo-2023-38), 2024-01-11
Supplement: Supplementary file [file angeo-2023-38-RC1-supplement.pdf]

Review of: **Investigation of the October effect in VLF signals**, by Marc Hansen et al submitted to *Annales geophysicae*.

The paper study focuses on the October effect using the VLF signal propagation technique. In its form, the paper presented materials are not convincing and should be revised. So I reject the publication of the paper.

-) In the data processing, it is not clear what the authors did when the noon time coincided with ionospheric disturbance times such as solar flares, lightning, early events, geomagnetic storms...

-) The color code used in the presented results are not clear and from figure to other the color code changes. For example, in figure 3 the NDK-KILL path is cyan colored but in figure 4 is violet. I recommend unifying the color coding for each path and using more forms not only two filled triangles. Also, use open forms rather than filled forms.
